# Supplementary material
Source: PubMed Central journal article supplement (PMC5520042)

## Supplementary figure 1.

Environmental parameters, bacterial abundance and specific respiration during the experiment. Circles represent the samples originating from the permanent pool (P), squares the medium (M) and diamonds the temporary (T) pool. Empty symbols indicate control samples. The grey shade represents the water level in the drying samples. P-values from corresponding ANOVA tests (parameter ~sampling point \* source + replicate) are presented in the upper right corners.

### A. Conductivity

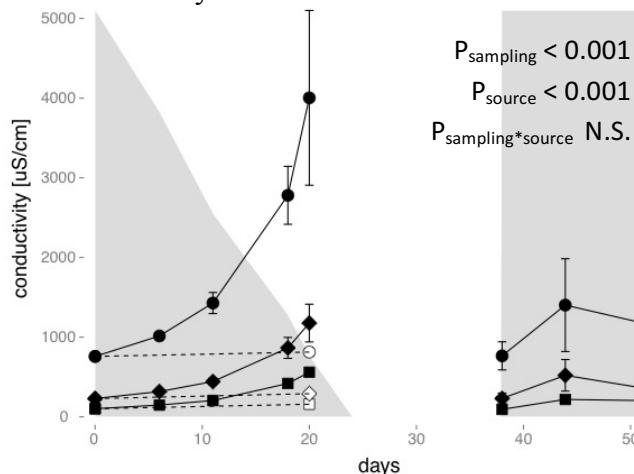

### B. TP

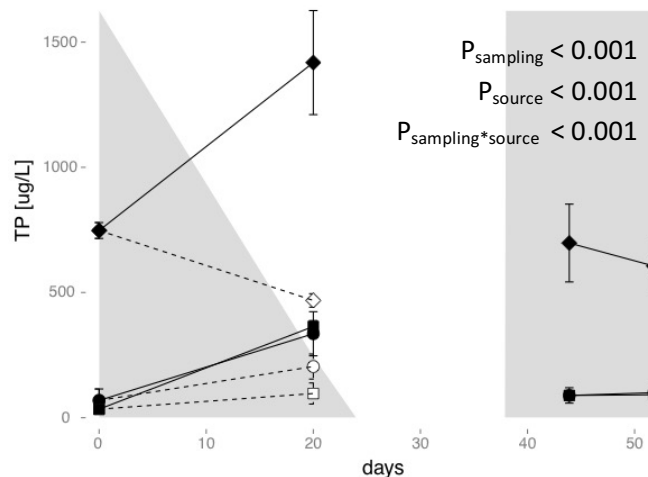

### C. TN

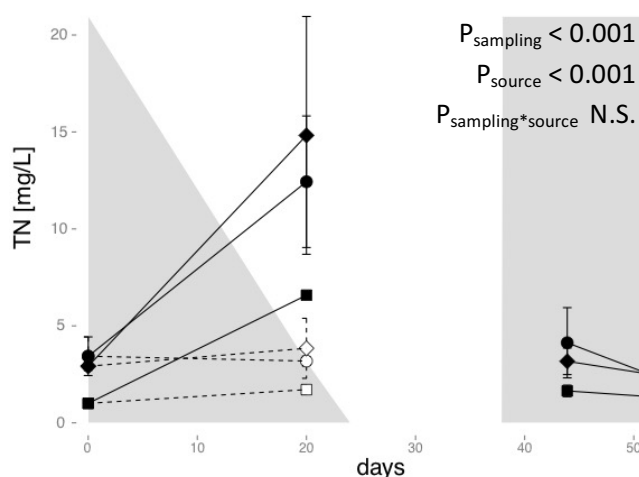

### D. DOC

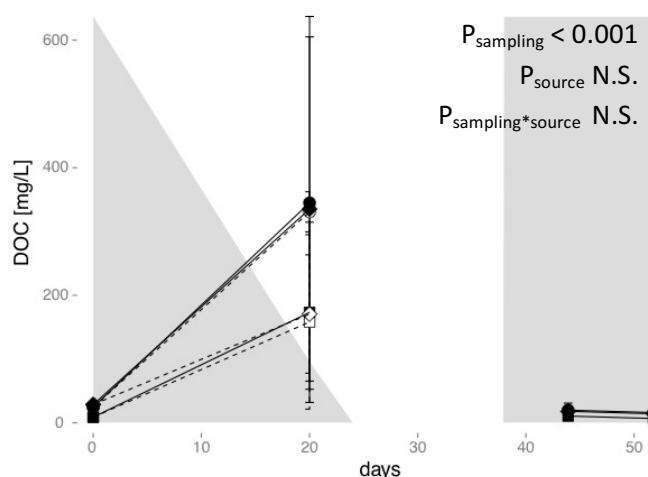

### E. Bacterial abundance

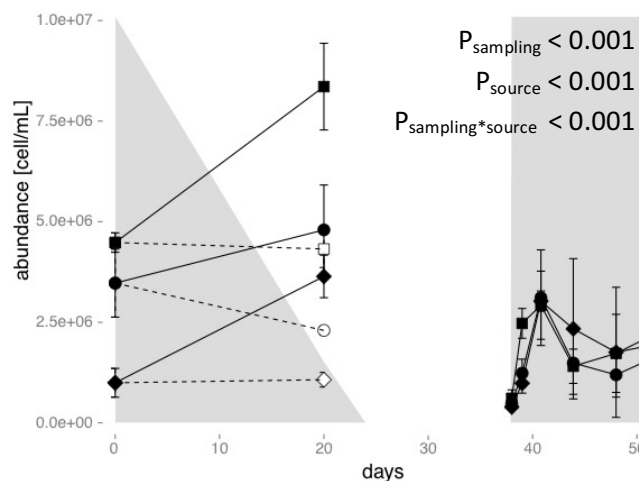

### F. Specific respiration

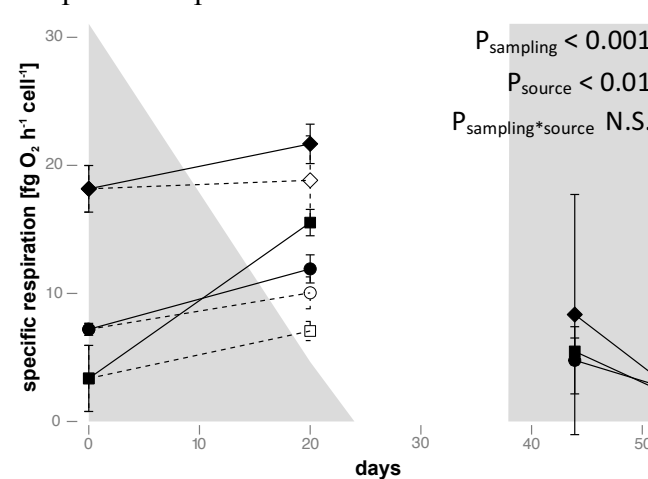

Supplement: ismej201755x1.pdf [file ismej201755x1.pdf]
