# Supplementary material
Source: PubMed Central journal article supplement (PMC5520042)

## Supplementary figure 2.

The relative abundances of the most abundant phyla and classes ( $\geq 1\%$  mean relative abundance in any sample) at the different sampling points and dispersal treatments.

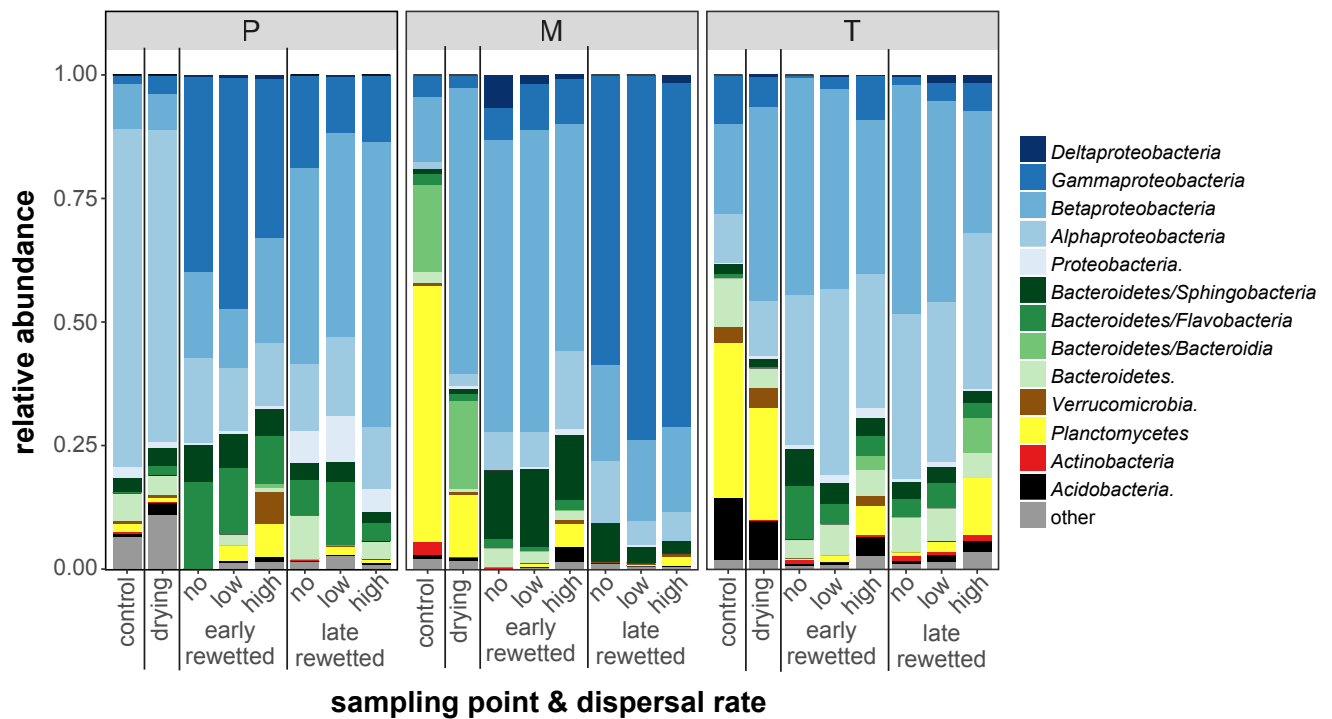

Supplement: ismej201755x2.pdf [file ismej201755x2.pdf]
