# Supplementary material
Source: PubMed Central journal article supplement (PMC5520042)
Supplement: ismej201755x3.pdf [file ismej201755x3.pdf]

**Supplementary table 1.**

Mean difference (lower half of tables) and Tukey's *post-hoc* pairwise comparison of the different environmental parameters and bacterial abundance at the sampling points

Significance codes: '\*\*\*' p<0.001 '\*\*' p<0.01 '\*' p<0.05, '.' p<0.1

**A. Conductivity**

| Source pool       | P      |         |                |               | M      |         |                |               | T      |         |                |               |
|-------------------|--------|---------|----------------|---------------|--------|---------|----------------|---------------|--------|---------|----------------|---------------|
| Mean difference/p | Drying | Control | Early rewetted | Late rewetted | Drying | Control | Early rewetted | Late rewetted | Drying | Control | Early rewetted | Late rewetted |
| Drying            |        | ***     | ***            | ***           |        | ***     | ***            | ***           |        | ***     | ***            | ***           |
| Control           | -3190  |         |                |               | -401   |         |                |               | -866   |         | **             |               |
| Early rewetted    | -2601  | 589     |                |               | -341   | 60      |                |               | -656   | 231     |                |               |
| Late rewetted     | -2846  | 344     | -245           |               | -357   | 44      | -16            |               | -830   | 56      | -174           |               |

**B. TP**

| Source pool    | P      |         |                |               | M      |         |                |               | T      |         |                |               |
|----------------|--------|---------|----------------|---------------|--------|---------|----------------|---------------|--------|---------|----------------|---------------|
| Sampling point | Drying | Control | Early rewetted | Late rewetted | Drying | Control | Early rewetted | Late rewetted | Drying | Control | Early rewetted | Late rewetted |
| Drying         |        |         | ***            | ***           |        | ***     | ***            | ***           |        | ***     | ***            | ***           |
| Control        | -131   |         |                |               | -268   |         |                |               | -950   |         |                |               |
| Early rewetted | -246   | -115    |                |               | -275   | -8      |                |               | -721   | 229     |                |               |
| Late rewetted  | -235   | -104    | 11             |               | -273   | -5      | 3              |               | -813   | 137     | -92            |               |

**C. TN**

| Source pool    | P      |         |                |               | M      |         |                |               | T      |         |                |               |
|----------------|--------|---------|----------------|---------------|--------|---------|----------------|---------------|--------|---------|----------------|---------------|
| Sampling point | Drying | Control | Early rewetted | Late rewetted | Drying | Control | Early rewetted | Late rewetted | Drying | Control | Early rewetted | Late rewetted |
| Drying         |        | **      | **             | ***           |        | ***     | ***            | ***           |        | **      | ***            | ***           |
| Control        | -4.9   |         |                |               | -9.3   |         |                |               | -10.9  |         |                |               |
| Early rewetted | -4.9   | -0.7    |                |               | -8.3   | 0.9     |                |               | -11.7  | -0.7    |                |               |
| Late rewetted  | -5.2   | -0.4    | -0.3           |               | -10.0  | -0.8    | -1.7           |               | -12.3  | -1.4    | -0.7           |               |

**D. DOC**

| Mean difference/p | Drying | Control | Early rewetted | Late rewetted |
|-------------------|--------|---------|----------------|---------------|
| Drying            |        |         | **             | ***           |
| Control           | -65    |         | *              | *             |
| Early rewetted    | -268   | -204    |                |               |
| Late rewetted     | -272   | -272    | -4             |               |

E. BA

| Source pool    | P        |          |                |               | M        |          |                |               | T        |         |                |               |
|----------------|----------|----------|----------------|---------------|----------|----------|----------------|---------------|----------|---------|----------------|---------------|
| Sampling point | Drying   | Control  | Early rewetted | Late rewetted | Drying   | Control  | Early rewetted | Late rewetted | Drying   | Control | Early rewetted | Late rewetted |
| Drying         |          | *        | **             | **            |          | ***      | ***            | ***           |          | *       |                |               |
| Control        | -2.5E+06 |          |                |               | -4.0E+06 |          | **             |               | -2.6E+06 |         |                |               |
| Early rewetted | -3.2E+06 | -7.2E+05 |                |               | -6.9E+06 | -2.9E+06 |                |               | -7.0E+05 | 1.9E+06 |                |               |
| Late rewetted  | -3.2E+06 | -6.6E+05 | 6.3E+04        |               | -6.1E+06 | -2.1E+06 | 7.8E+05        |               | -1.7E+06 | 8.8E+05 | -9.8E+05       |               |

F. sBR

| Source pool    | P      |         |                |               | M      |         |                |               | T      |         |                |               |
|----------------|--------|---------|----------------|---------------|--------|---------|----------------|---------------|--------|---------|----------------|---------------|
| Sampling point | Drying | Control | Early rewetted | Late rewetted | Drying | Control | Early rewetted | Late rewetted | Drying | Control | Early rewetted | Late rewetted |
| Drying         |        |         | **             | ***           |        | ***     | ***            | ***           |        |         |                | *             |
| Control        | -1.87  |         | *              | **            | -8.47  |         |                | *             | -2.84  |         |                |               |
| Early rewetted | -5.27  | -7.14   |                |               | -10.06 | -1.59   |                |               | -10.39 | -13.26  |                |               |
| Late rewetted  | -7.34  | -9.21   | -2.07          |               | -13.19 | -4.73   | -3.13          |               | -15.72 | -18.56  | -5.32          |               |
