# Supplementary material
Source: PubMed Central journal article supplement (PMC5520042)
Supplement: ismej201755x4.pdf [file ismej201755x4.pdf]

**Supplementary table 2.**

Variance ( $R^2$ ) in BCC explained by sampling point, source pool and their interaction based on pairwise comparison of the different sampling points by PERMANOVA test (formula = OTU table ~ sampling point \* source).

Significance codes: '\*\*\*'  $p < 0.001$  '\*\*'  $p < 0.01$  '\*'  $p < 0.05$ , '.'  $p < 0.1$

**A. Effect of sampling point**

| Variance explained/p | Drying | Control | Early rewetted | Late rewetted |
|----------------------|--------|---------|----------------|---------------|
| Drying               |        | *       | ***            | ***           |
| Control              | 6.7%   |         | ***            | ***           |
| Early rewetted       | 18.9%  | 18.9%   |                | **            |
| Late rewetted        | 19.6%  | 20.8%   | 7.8%           |               |

**B. Effect of source**

| Variance explained/p | Drying | Control | Early rewetted | Late rewetted |
|----------------------|--------|---------|----------------|---------------|
| Drying               |        | ***     | ***            | ***           |
| Control              | 61.9%  |         | ***            | ***           |
| Early rewetted       | 28.6%  | 30.0%   |                | ***           |
| Late rewetted        | 33.1%  | 31.3%   | 43.9%          |               |

**C. Effect of sampling point \* sample source**

| Variance explained/p | Drying | Control | Early rewetted | Late rewetted |
|----------------------|--------|---------|----------------|---------------|
| Drying               |        | *       | ***            | ***           |
| Control              | 9.2%   |         | ***            | ***           |
| Early rewetted       | 26.1%  | 24.2%   |                | **            |
| Late rewetted        | 26.1%  | 26.4%   | 14.8%          |               |
