# Supplementary material
Source: PubMed Central journal article supplement (PMC5520042)
Supplement: ismej201755x5.pdf [file ismej201755x5.pdf]

**Supplementary table 3.**

Variance ( $R^2$ ) in CSUP explained by sampling point, source pool and their interaction based on pairwise comparison of the different sampling points by PERMANOVA test (formula = Biolog substrate utilization table ~ sampling time \* sample source).

Significance codes: '\*\*\*' <0.001 '\*\*' <0.01 '\*' <0.05, '.' <0.1

**A. Effect of sampling point**

| Variance explained/p | Drying | Control | Early rewetted | Late rewetted |
|----------------------|--------|---------|----------------|---------------|
| Drying               |        | ***     | ***            | ***           |
| Control              | 16.3%  |         | ***            | ***           |
| Early rewetted       | 20.3%  | 25.4%   |                |               |
| Late rewetted        | 17.3%  | 26.0%   | 5.2%           |               |

**B. Effect of sample source**

| Variance explained/p | Drying | Control | Early rewetted | Late rewetted |
|----------------------|--------|---------|----------------|---------------|
| Drying               |        | ***     | **             | ***           |
| Control              | 23.9%  |         | ***            | ***           |
| Early rewetted       | 20.8%  | 22.2%   |                | ***           |
| Late rewetted        | 21.0%  | 26.4%   | 44.5%          |               |

**C. Effect of sampling point \* sample source**

| Variance explained/p | Drying | Control | Early rewetted | Late rewetted |
|----------------------|--------|---------|----------------|---------------|
| Drying               |        | *       | .              | ***           |
| Control              | 12.9%  |         | ***            | ***           |
| Early rewetted       | 13.1%  | 17.3%   |                |               |
| Late rewetted        | 18.1%  | 17.3%   | 8.6%           |               |
