# Supplementary material
Source: PubMed Central journal article supplement (PMC5520042)
Supplement: ismej201755x6.pdf [file ismej201755x6.pdf]

**Supplementary table 4.**

PERMANOVA test testing differences in variance of BCC and CSUP explained by dispersal rates, source pool and their interaction at the early and late dispersal treatment, respectively (formula = OTU table or Biolog substrate utilization ~ dispersal rate \* sample source + replicate).

Significance codes: ‘\*\*\*\*’ <0.001 ‘\*\*’ <0.01 ‘\*’ <0.05, ‘.’ <0.1

|                            | Early rewetted     |                 | Late rewetted      |                 |
|----------------------------|--------------------|-----------------|--------------------|-----------------|
|                            | Variance explained | <i>p</i> -value | Variance explained | <i>p</i> -value |
| <b>Dispersal treatment</b> |                    |                 |                    |                 |
| BCC                        | 6.69%              | .               | 3.67%              | ns              |
| CSUP                       | 13.5%              | **              | 8.45%              | *               |
| <b>Sample source</b>       |                    |                 |                    |                 |
| BCC                        | 43.7%              | ***             | 61.2%              | ***             |
| CSUP                       | 21.8%              | ***             | 31.7%              | ***             |
| <b>Dispersal * source</b>  |                    |                 |                    |                 |
| BCC                        | 6.50%              | ns              | 5.72%              | ns              |
| CSUP                       | 9.74%              | ns              | 9.79%              | ns              |
