# Supplementary material
Source: PubMed Central journal article supplement (PMC5520042)
Supplement: ismej201755x7.pdf [file ismej201755x7.pdf]

**Supplementary table 5.**

Results of a two-way ANOVAs testing the effect of dispersal treatment, source pool and their interaction at the early and late rewetted sampling

|                                     | Dispersal rate |         | Source |         | Dispersal rate * source |         |
|-------------------------------------|----------------|---------|--------|---------|-------------------------|---------|
|                                     | F              | p-value | F      | p-value | F                       | p-value |
| <i>Early rewetted sampling</i>      |                |         |        |         |                         |         |
| <b>Rewetting tolerant OTUs</b>      | 0.3443         | ns      | 5.762  | **      | 0.1039                  | ns      |
| <b>Rewetting sensitive OTUs</b>     | 22.4           | ***     | 1.224  | ns      | 0.9276                  | ns      |
| <b>Rewetting opportunistic OTUs</b> | 10.86          | **      | 3.451  | .       | 0.2042                  | ns      |
| <b>Specific respiration</b>         | 4.422          | *       | 0.5181 | ns      | 0.3225                  | ns      |
| <i>Late rewetted sampling</i>       |                |         |        |         |                         |         |
| <b>Rewetting tolerant OTUs</b>      | 0.0771         | ns      | 15.88  | ***     | 0.1675                  | ns      |
| <b>Rewetting sensitive OTUs</b>     | 13.30          | ***     | 2.536  | .       | 1.151                   | ns      |
| <b>Rewetting opportunistic OTUs</b> | 12.56          | ***     | 64.86  | ***     | 0.5462                  | ns      |
| <b>Specific respiration</b>         | 1.162          | ns      | 4.974  | *       | 0.4660                  | ns      |
