# Supplementary material
Source: PubMed Central journal article supplement (PMC5520042)
Supplement: ismej201755x8.pdf [file ismej201755x8.pdf]

**Supplementary table 6.**

Results of two-way ANOVAs testing predicted vs measured values, the effect of source pool and their interaction in the early and late rewetted dispersal treatment samples (low and high dispersal treatment only)

|                                     | Prediction |                 | Source |                 | Prediction * source |                 |
|-------------------------------------|------------|-----------------|--------|-----------------|---------------------|-----------------|
|                                     | F          | <i>p</i> -value | F      | <i>p</i> -value | F                   | <i>p</i> -value |
| <i>Early rewetted dispersal</i>     |            |                 |        |                 |                     |                 |
| <b>Rewetting tolerant OTUs</b>      | 0.7330     | ns              | 6.751  | **              | 0.0325              | ns              |
| <b>Rewetting sensitive OTUs</b>     | 10.61      | **              | 3.138  | .               | 0.9388              | ns              |
| <b>Rewetting opportunistic OTUs</b> | 12.46      | **              | 5.806  | **              | 0.1521              | ns              |
| <b>Specific respiration</b>         | 14.46      | ***             | 1.001  | ns              | 0.5406              | ns              |
| <i>Late rewetted dispersal</i>      |            |                 |        |                 |                     |                 |
| <b>Rewetting tolerant OTUs</b>      | 1.031      | ns              | 67.48  | ***             | 2.903               | .               |
| <b>Rewetting sensitive OTUs</b>     | 2.117      | ns              | 9.243  | ***             | 2.004               | ns              |
| <b>Rewetting opportunistic OTUs</b> | 17.77      | ***             | 148.3  | ***             | 0.008               | ns              |
| <b>Specific respiration</b>         | 0.0384     | ns              | 6.147  | **              | 1.380               | ns              |
